# Supplementary material
Source: Research Square preprint supplement (doi:10.21203/rs.3.rs-9432790/v1)
Supplement: Supplementary file 2 [file e3a24c0bbb9035539b3c7174.docx]

**Extended Data Fig. 1. Representative π-scaffold engineering strategies for SAM design.** Overview of reported molecular-design routes for SAM, including π-extension and functional substitution, asymmetric reconstruction, incorporation of halogen bonding, and peri-fused polyaromatic hydrocarbons without heteroatoms, all directed towards improved interfacial packing, coupling or charge transport.

**Extended Data Fig. 2. Surface potential and film morphology of SAM-modified buried interfaces.** **a)** Kelvin probe force microscopy (KPFM) images of ITO/SAM substrates. **b)** Top-view and cross-sectional scanning electron microscopy (SEM) images of ITO/SAM/perovskite films formed on DBT32ID- and DBT43ID-modified substrates.

**Extended Data Fig. 3. Laboratory-source GIWAXS and XRD characterization of perovskite films on SAM-modified substrates.** GIWAXS patterns of ITO/SAM/perovskite samples incorporating a) DBT21ID, b) DBT32ID, c) DBT34ID and d) DBT43ID measured using a laboratory, non-synchrotron X-ray source. e) X-ray diffraction patterns of the corresponding samples. The largely unchanged GIWAXS patterns and main XRD reflections indicate that the SAMs preserve the bulk perovskite phase, while subtly modulating microstructural order, as evidenced by small differences in the characteristic *δ*-phase-related regions.

**Extended Data Fig. 4. Photoluminescence characteristics of perovskite films on SAM-modified substrates.** **a)** Steady-state PL spectra of ITO/SAM/perovskite samples incorporating different SAMs. PL mapping of ITO/SAM/perovskite samples based on b) DBT32IDand c) DBT43ID.

**Extended Data Table 1. Summary of photovoltaic parameters for different device types employing various SAMs.**

| **Device types** | **SAMs** | ***J*SC**  **[mA cm-2]** | **VOC**  **[V]** | **FF**  **[%]** | **PCE**  **[%]** |
| --- | --- | --- | --- | --- | --- |
| 0.058 cm2  *E*g = 1.53 eV | DBT21ID | 26.82 | 1.195 | 82.81 | 26.52 |
| DBT32ID | 26.56 | 1.182 | 86.55 | 27.17 |
| DBT34ID | 26.75 | 1.213 | 86.69 | 28.11 |
| DBT43ID | 26.69 | 1.192 | 85.85 | 27.28 |
| 1.004 cm2  *E*g = 1.53 eV | DBT21ID | 25.80 | 1.163 | 82.4214 | 24.76 |
| DBT32ID | 25.45 | 1.164 | 83.0376 | 24.59 |
| DBT34ID | 25.55 | 1.163 | 85.0598 | 25.28 |
| DBT43ID | 25.78 | 1.159 | 83.8544 | 25.06 |
| 0.058 cm2  *E*g = 1.68 eV | DBT21ID | 23.25 | 1.235 | 83.67 | 24.02 |
| DBT32ID | 22.93 | 1.228 | 83.04 | 23.38 |
| DBT34ID | 23.37 | 1.257 | 85.02 | 24.99 |
| DBT43ID | 23.15 | 1.253 | 84.21 | 24.44 |
